# Supplementary material for: Regioselective synthesis of spiroxindolopyrrolidine: a one step cycloaddition reaction twists inherent optical and fluorescence property of ferrocene–anthracene dyad
Source: Royal Society of Chemistry journal article supplement (doi:10.1039/c6ra22482b), 2016-01-01
Supplement: c6ra22482b1.pdf [file c6ra22482b1.pdf]

### Supporting Information

#### **Regioselective synthesis of spiroxindolopyrrolidine: A one step cycloaddition reaction twists inherent optical and fluorescence property of Ferrocene-Anthracene dyad**

Pasupathy Saravanan, † Shanmugam Sundaramoorthy ‡ and Raghavachary Raghunathan, † \*

† Department of Organic Chemistry, and ‡Centre of Advanced Study in Crystallography and  
Biophysics, University of Madras, Guindy Campus, Chennai 600 025, INDIA.

**E-mail:** ragharaghunathan@yahoo.com

#### CONTENTS

|    |                                             | <b>Page No.</b> |
|----|---------------------------------------------|-----------------|
| 1. | <b>Experimental</b> :                       | <b>S2</b>       |
| 2. | <b>NMR Spectrum</b> :                       | <b>S6</b>       |
| 2. | <b>X-ray studies</b> :                      | <b>S11</b>      |
|    | (Table 1)                                   |                 |
| 3. | <b>UV-Vis &amp; Fluorescence Spectrum</b> : | <b>S13</b>      |
| 4. | <b>Life-time Fluorescence spectrum</b> :    | <b>S14</b>      |

## 1. Experimental Section

**General Considerations.** All melting points are uncorrected. IR spectra were recorded on a SHIMADZU IR-8300 series FT-IR spectrophotometer.  $^1\text{H}$  NMR and  $^{13}\text{C}$  NMR spectra were recorded on BRUKER 300 MHz instrument in  $\text{CDCl}_3$  solvent with TMS as a standard. Mass spectra were recorded by ESI Q-ToF Mass Spectrometer (Micromass). Elemental analysis was carried out using Perkin-Elmer CHNS 2400 instrument. Column chromatography was performed on silica gel (ACME, 100-200 mesh). Routine monitoring of the reaction was done using thin layer chromatography developed on glass plates coated with silica gel-G (ACME) of 25 mm thickness and visualized with iodine. The organic extracts of crude products were dried over anhydrous  $\text{Na}_2\text{SO}_4$ . Solvents were reagent grade and were purified according to standard procedures. The starting materials isatin and sarcosine were purchased commercially and used as such.

### Proceducre for the synthesis of ferrocene based dipolarophiles 1:

A solution of 9-anthraldehyde (1.1 mmol), acetylferrocene (1mmol), powdered KOH (2mmol) in ethanol (10mL) were stirred at room temperature. After the completion of the reaction as evidenced by TLC, the solid obtained was filtered and washed with chilled ethanol. The crude product was recrystallized in ethanol.

### 1-ferrocenyl-3-anthracenyl-prop-2-ene-1-one (1)

$^1\text{H}$  NMR ( $\text{CDCl}_3$ /300 MHz) :  $\delta$  4.29 (s, 5H), 4.61(s, 2H), 4.91(s, 2H), 7.10 (d,  $J = 15.9$  Hz, 1H), 7.49-8.48 (m, 9H), 8.72 (d,  $J = 15.9$  Hz, 1H)

### General procedure for the synthesis of ferrocene based spiro-cycloadduct:

A solution of the dipolarophile **1** derived from ferrocene (1mmol), isatin (1mmol) and sarcosine (1mmol) were refluxed in 10 mL toluene until completion of the reaction as evidenced by TLC (8 hours). The solvent was removed under reduced pressure and the crude product was subjected to column chromatography using petroleum ether: ethyl acetate (4:1) as eluent. The product was then recrystallized from methanol.

Thus were prepared:

**1-N-Methyl-spiro-[2.3']oxindole-3-ferrocenyl-4-anthracenylpyrrolidine (4a):** Following General Procedure, reaction of dyad **1** (100 mg, 0.24 mmol) with isatin **2a** (35.34 mg, 0.24 mmol) and sarcosine (21.38 mg, 0.24 mmol) in toluene (10 mL) yielded after column chromatography (Hexane/AcOEt 4/1) **4a** as a orange solid (115 mg, 81.15%). M.p.: 242 °C; IR (KBr) : 1668, 1706  $\text{cm}^{-1}$ ;  $^1\text{H}$  NMR ( $\text{CDCl}_3/300$  MHz) :  $\delta$  2.28 (s, 3H), 2.87 (s, 5H), 3.70 (t,  $J = 9.6$  Hz, 1H), 4.12-4.18 (m, 3H), 4.39 (s, 1H), 4.51 (s, 1H), 5.18 (d,  $J = 10.5$  Hz, 1H), 6.33 (q,  $J = 13.5$  Hz, 1H), 6.72 (d,  $J = 7.2$  Hz, 1H), 6.92-9.67 (m, 13H), 8.63 (s, 1H);  $^{13}\text{C}$  NMR ( $\text{CDCl}_3/75$  MHz) : 35.4, 38.8, 68.4, 68.8, 69.5, 72.6, 76.6, 78.7, 109.8, 112.3, 118.1, 124.0, 124.9, 125.8, 126.3, 128.0, 129.0, 129.9, 138.6, 149.1, 159.2, 182.9, 199.6 ppm; Mass spectrum  $m/z$ : 591.20 ( $\text{M}+\text{H}^+$ ); CHN Analysis calculated for  $\text{C}_{37}\text{H}_{30}\text{FeN}_2\text{O}_2$ : C, 75.26; H, 5.12; N, 4.74 %.; Found : C, 75.23; H, 5.15; N, 4.79 %.

### **1-N-Methyl-spiro-[2.3']-N-allyl-oxindole-3-ferrocenoyl-4-anthracenylpyrrolidine(4b):**

Following General Procedure, reaction of dyad **1** (100 mg, 0.24 mmol) with N-allylisatin **2b** (44.92 mg, 0.24 mmol) and sarcosine (21.38 mg, 0.24 mmol) in toluene (10 mL) yielded after

column chromatography (Hexane/AcOEt 4/1) **4b** as a orange solid (119 mg, 78.63 %). M.p.: 238 °C; IR (KBr) : 1656, 1720 cm<sup>-1</sup>; <sup>1</sup>H NMR (CDCl<sub>3</sub>/300 MHz) : δ 2.22 (s, 3H), 2.86 (s, 5H), 3.71 (t, *J* = 9.6 Hz, 1H), 4.11-4.45 (m, 7H), 4.96-5.05 (m, 2H), 5.18 (d, *J* = 10.5 Hz, 1H), 5.28 - 5.65 (m, 1H), 6.36 (q, 1H), 6.67 (d, *J* = 7.2 Hz, 1H), 7.12-8.03 (m, 10H), 8.37 (s, 1H), 8.95 (d, *J* = 9.3 Hz, 1H), 9.71 (d, *J* = 9 Hz, 1H); <sup>13</sup>C NMR (CDCl<sub>3</sub>/75 MHz) : 35.4, 38.3, 42.4, 59.8, 61.5, 68.4, 69.7, 72.2, 72.6, 76.0, 78.7, 109.0, 117.7, 122.7, 124.8, 124.9, 125.0, 125.4, 125.9, 126.2, 126.4, 127.2, 127.9, 128.9, 129.0, 129.8, 131.0, 131.2, 131.6, 132.2, 133.3, 142.2, 176.9, 199.5 ppm. ; Mass spectrum *m/z*: 631.34 (M+H)<sup>+</sup>; CHN Analysis, Calculated for C<sub>40</sub>H<sub>34</sub>FeN<sub>2</sub>O<sub>2</sub> : C, 76.19; H, 5.43; N, 4.44 %. Found : C, 76.22; H, 5.49; N, 4.42 %.

**1-*N*-Methyl-spiro-[2.3']-*N*-methyl-oxindole-3-ferrocenoyl-4-anthracenyl pyrrolidine (4c):**

Following General Procedure, reaction of dyad **1** (100 mg, 0.24 mmol) with *N*-methyl isatin **2c** (38.67 mg, 0.24 mmol) and sarcosine (21.38 mg, 0.24 mmol) in toluene (10 mL) yielded after column chromatography (Hexane/AcOEt 4/1) **4c** as a orange solid (117 mg, 80.64%). M.p. : 260 °C; IR (KBr) : 1667, 1702 cm<sup>-1</sup>; <sup>1</sup>H NMR (CDCl<sub>3</sub>/300 MHz) : δ 2.24 (s, 3H), 2.88 (s, 5H), 3.14 (s, 3H), 3.70 (t, *J* = 9.45, 1H), 4.06-4.19 (m, 3H), 4.37 (d, *J* = 13.2 Hz, 1H), 5.152 (d, *J* = 10.2 Hz, 1H), 6.31-6.34 (m, 1H), 6.66 (d, *J* = 7.8 Hz, 1H), 7.11-8.03 (m, 10H), 8.36 (s, 1H), 8.96 (d, *J* = 9 Hz, 1H), 9.71 (d, *J* = 9 Hz, 1H); <sup>13</sup>C NMR (CDCl<sub>3</sub>/75 MHz) : 26.19, 35.37, 38.34, 59.76, 61.69, 68.36, 69.17, 72.22, 72.49, 78.75, 107.99, 122.79, 124.92, 125.07, 125.66, 125.91, 126.23, 126.53, 127.09, 127.91, 129.03, 129.82, 131.29, 131.68, 132.20, 133.15, 143.05, 177.47, 199.58 ppm. Mass spectrum *m/z*: 606.43 (M+H)<sup>+</sup>; CHN Analysis, Calculated for C<sub>38</sub>H<sub>33</sub>FeN<sub>2</sub>O<sub>2</sub>: C, 75.37; H, 5.49; N, 4.63 %. Found : C, 75.41; H, 5.57; N, 4.54 %.

**1-*N*-Methyl-spiro-[2.3']-*N*-benzyl-oxindole-3-ferrocenoyl-4-anthracenylpyrrolidine (4d):**

Following General Procedure, reaction of dyad **1** (100 mg, 0.24 mmol) with *N*-benzylisatin **2d** (56.94 mg, 0.24 mmol) and sarcosine (21.38 mg, 0.24 mmol) in toluene (10 mL) yielded after column chromatography (Hexane/AcOEt 4/1) **4d** as a orange solid (126 mg, 77.19%). M.p.: 248 °C; IR (KBr) : 1667, 1702 cm<sup>-1</sup>; <sup>1</sup>H NMR (CDCl<sub>3</sub>/300 MHz) : δ 2.23 (s, 3H), 2.86 (s, 5H), 3.72 (t, *J* = 9.6 Hz, 1H), 4.10-4.22 (m, 3H), 4.46 (d, *J* = 18 Hz, 1H), 4.83 (d, *J* = 15.9 Hz, 1H),

4.46 (d,  $J=15.6$  Hz, 1H), 5.25 (d,  $J=10.2$  Hz, 1H), 6.35 (q,  $J=6.9$  Hz, 1H), 6.53-6.56 (m, 1H), 7.04-8.05 (m, 15H), 8.38 (s, 1H), 8.95 (d,  $J=9.3$  Hz, 1H), 9.74 (d,  $J=9$  Hz, 1H);  $^{13}\text{C}$  NMR ( $\text{CDCl}_3/75$  MHz) : 35.4, 38.4, 44.0, 59.8, 61.3, 68.5, 68.7, 69.9, 72.4, 72.7, 78.8, 109.2, 122.7, 124.8, 125.3, 126.0, 126.3, 126.4, 127.1, 127.2, 127.4, 127.9, 128.6, 129.0, 129.8, 131.2, 131.7, 132.2, 133.3, 135.4, 142.3, 177.2, 199.6 ppm.; Mass spectrum  $m/z$ : 681.41 (M+H) $^+$  ; CHN Analysis calculated for  $\text{C}_{44}\text{H}_{36}\text{FeN}_2\text{O}_2$  : C, 77.65; H, 5.33; N, 4.12 %. Found : C, 77.59; H, 5.47; N, 4.24 %.

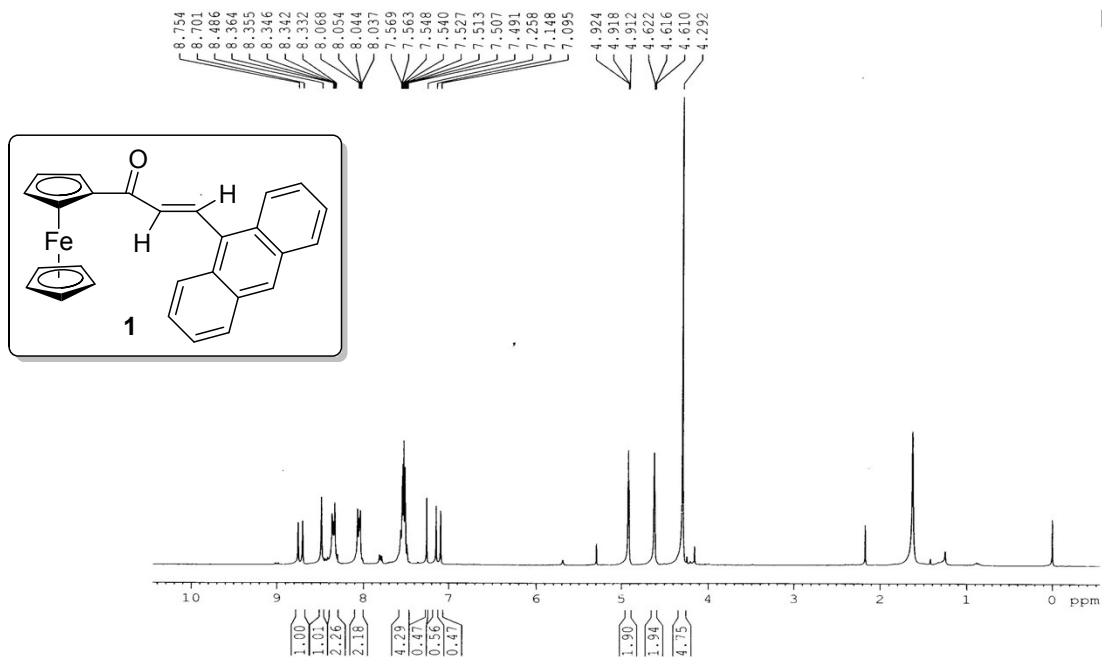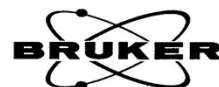

```

Current Data Parameters
NAME      SPR-128
EXPNO    1
PROCNO   1

F2 - Acquisition Parameters
Date_    20100802
Time     21.48
INSTRUM spect
PROBHD   5 mm DUL 13C-1
PULPROG zg30
TD       65536
SOLVENT  CDCl3
NS       16
DS       2
SWH      6172.839 Hz
FIDRES   0.094190 Hz
AQ       5.3084660 sec
RG       322.5
DW       81.000 usec
DE       6.00 usec
TE       300.0 K
D1       1.00000000 sec
TDO      1

----- CHANNEL f1 -----
NUC1     1H
P1       13.15 usec
PL1      0.00 dB
SFO1     300.1318534 MHz

F2 - Processing parameters
SI       32768
SF       300.1300054 MHz
WDW      EM
SSB      0
LB       0.30 Hz
GB       0
PC       1.00

```

Figure S1. <sup>1</sup>H NMR Spectrum of 1

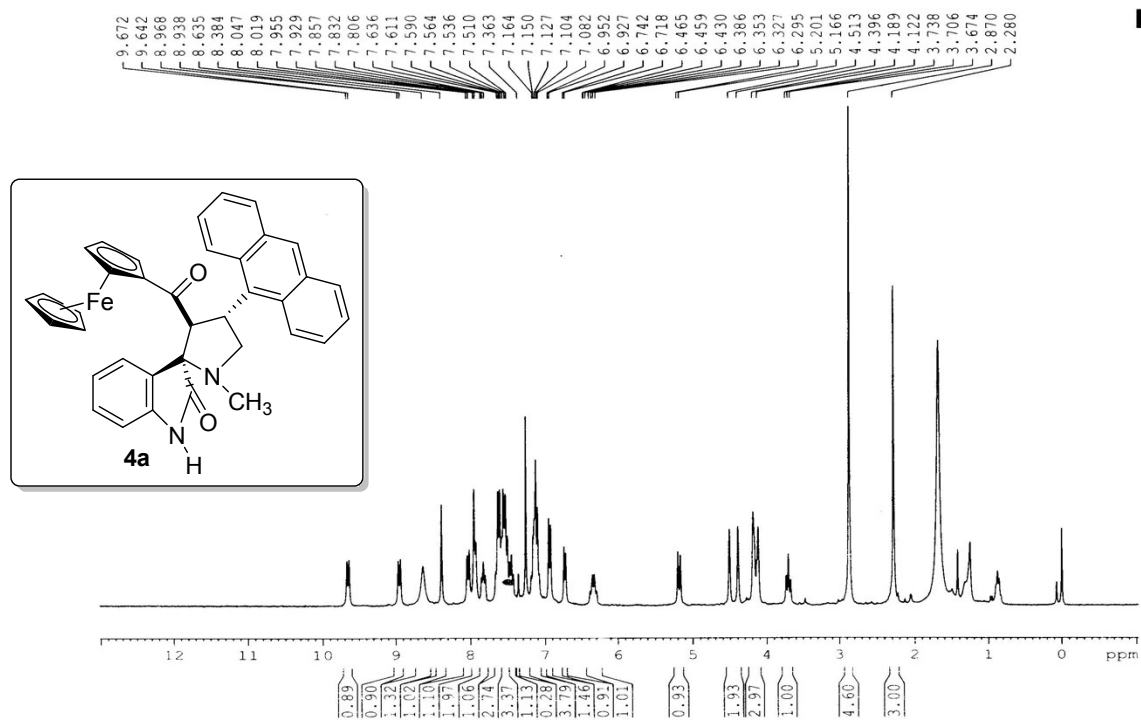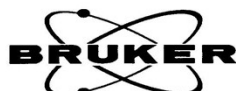

```

Current Data Parameters
NAME      SPR-139
EXPNO    1
PROCNO   1

F2 - Acquisition Parameters
Date_    20100817
Time     13.43
INSTRUM spect
PROBHD   5 mm DUL 13C-1
PULPROG zg30
TD       65536
SOLVENT  CDCl3
NS       16
DS       2
SWH      6172.839 Hz
FIDRES   0.094190 Hz
AQ       5.3084660 sec
RG       322.5
DW       81.000 usec
DE       6.00 usec
TE       300.0 K
D1       1.00000000 sec
TDO      1

----- CHANNEL f1 -----
NUC1     1H
P1       13.15 usec
PL1      0.00 dB
SFO1     300.1318534 MHz

F2 - Processing parameters
SI       32768
SF       300.1300054 MHz
WDW      EM
SSB      0
LB       0.30 Hz
GB       0
PC       1.00

```

Figure S2. <sup>1</sup>H NMR Spectrum of 4a

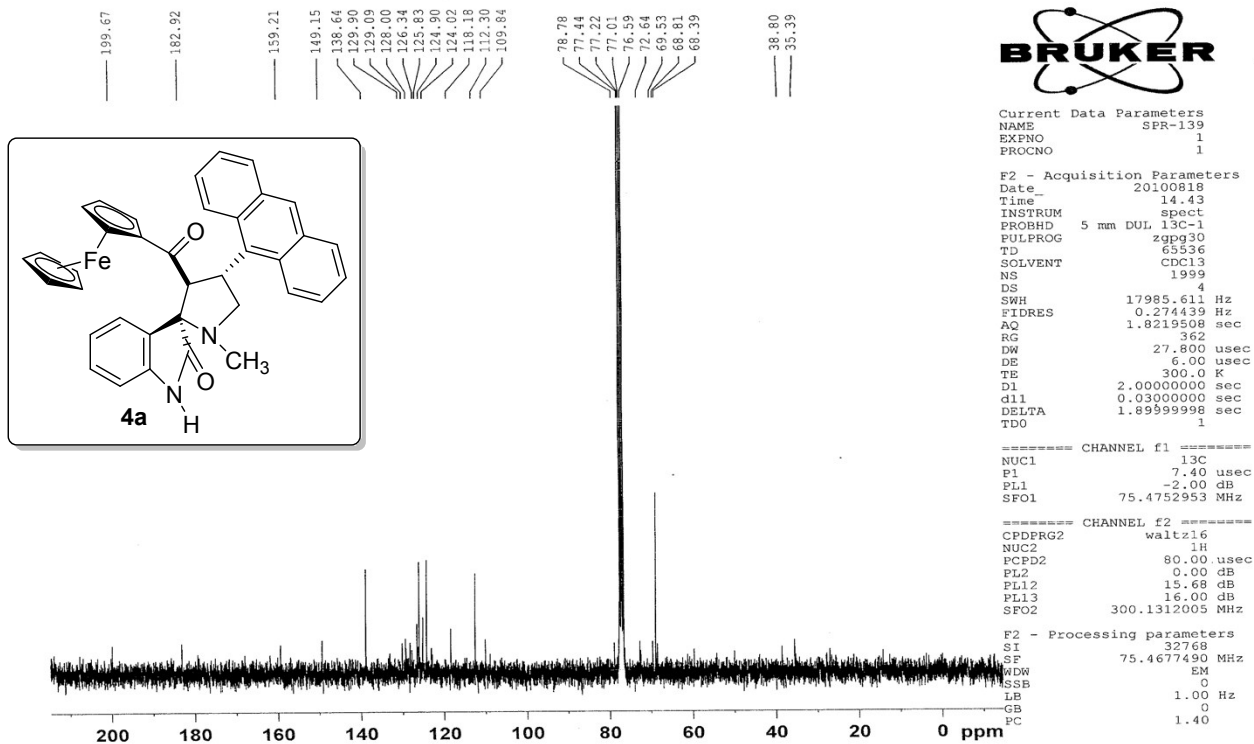

Figure S3. <sup>13</sup>C NMR Spectrum of 4a

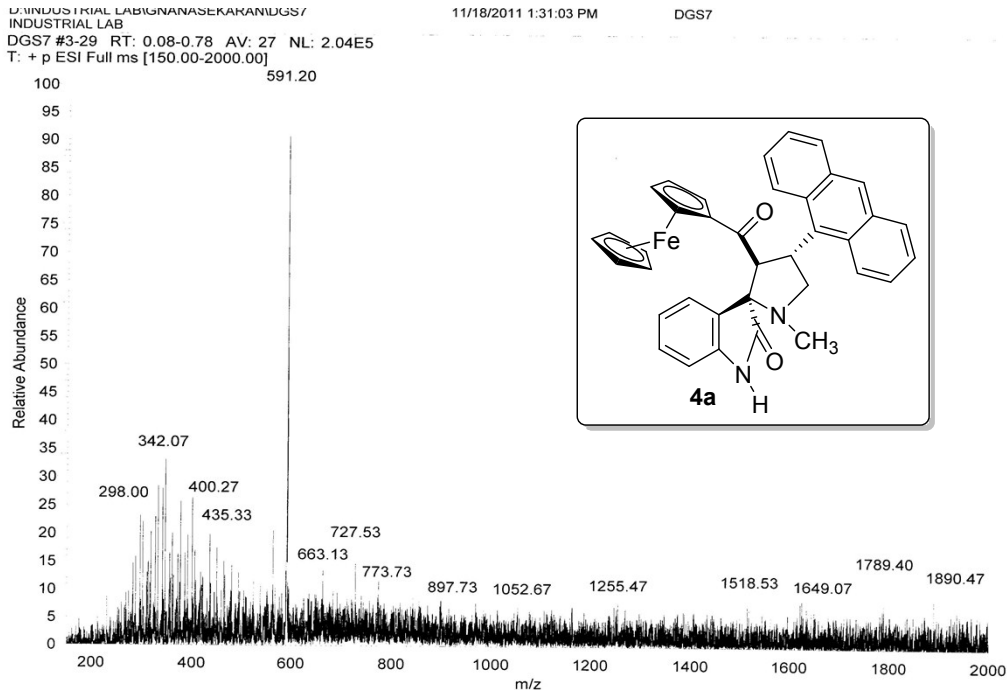

Figure S4. Mass Spectrum of 4a

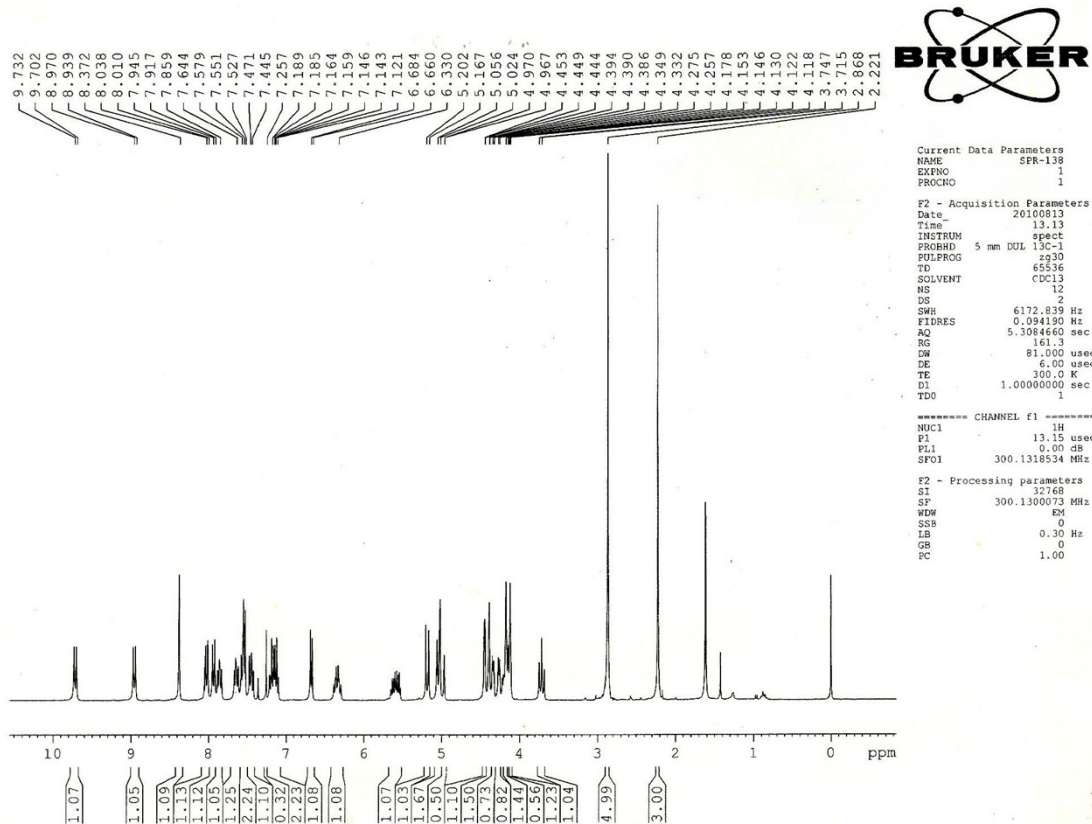

Figure S5. <sup>1</sup>H NMR Spectrum of 4b

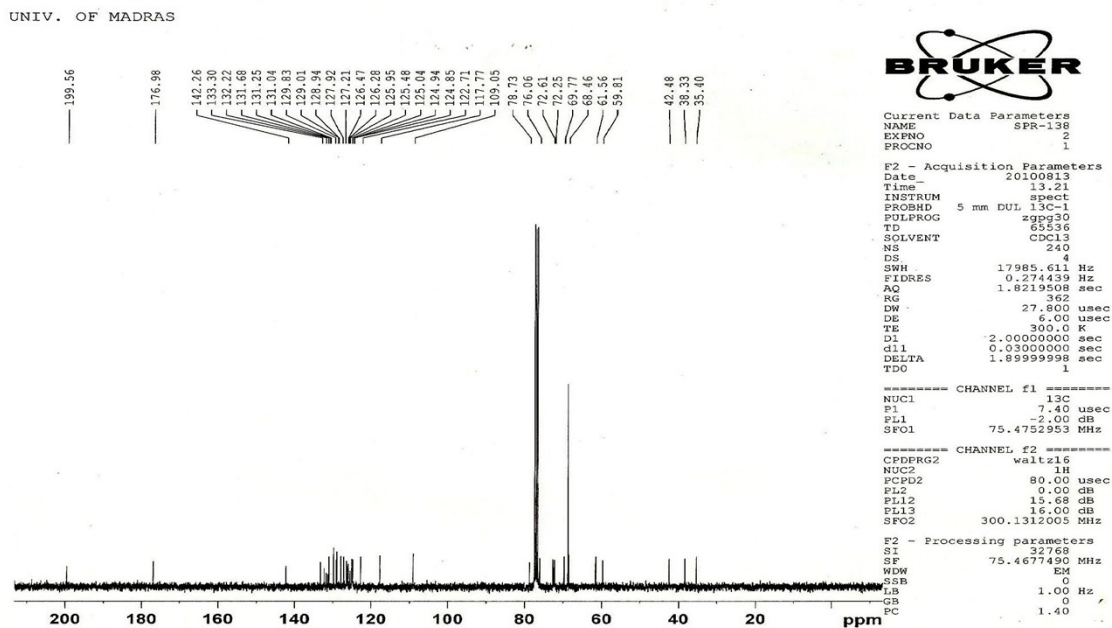

Figure S6. <sup>13</sup>C NMR Spectrum of 4b



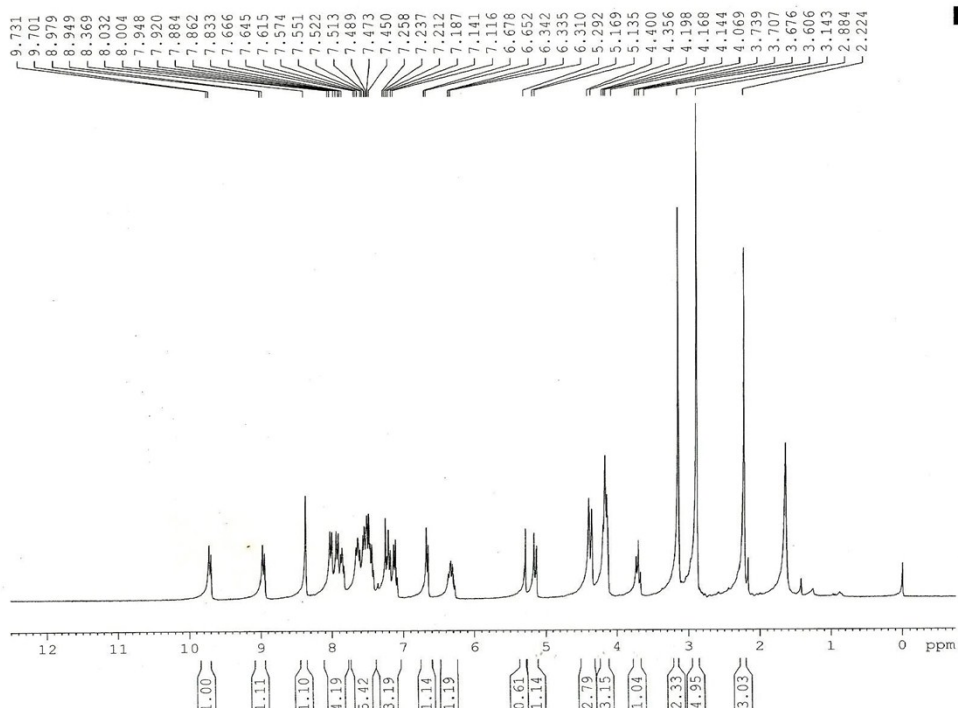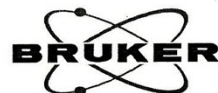

```

Current Data Parameters
NAME          SPR-140
EXPNO         2
PROCNO        1

F2 - Acquisition Parameters
Date_         20100817
Time          15.38
INSTRUM       spect
PROBHD        5 mm DUL 13C-1
PULPROG       zg30
TD            65536
SOLVENT       CDCl3
NS            16
DS            2
SWH           6172.839 Hz
FIDRES        0.094190 Hz
AQ            5.3084660 sec
RG            181
DW            81.000 usec
DE            6.00 usec
TE            300.0 K
D1            1.00000000 sec
D11           1
D12           1
D13           1
D14           1
D15           1
D16           1
D17           1
D18           1
D19           1
D20           1

----- CHANNEL f1 -----
NUC1          1H
P1            13.15 usec
PL1           0.00 dB
SFO1          300.1318534 MHz

F2 - Processing parameters
SI            32768
SF            300.1300061 MHz
WDW           EM
SSB           0
LB            0.30 Hz
GB            0
PC            1.00
  
```

Figure S7. <sup>1</sup>H NMR Spectrum of 4c

UNIV. OF MADRAS

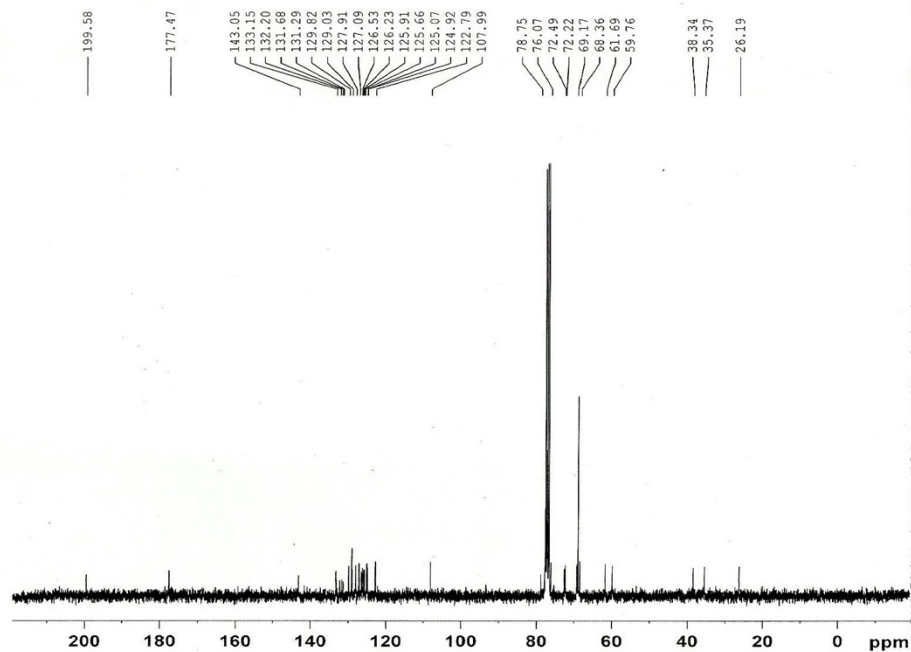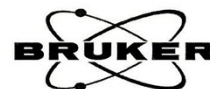

```

Current Data Parameters
NAME          SPR-140
EXPNO         3
PROCNO        1

F2 - Acquisition Parameters
Date_         20100817
Time          15.43
INSTRUM       spect
PROBHD        5 mm DUL 13C-1
PULPROG       zgpg30
TD            65536
SOLVENT       CDCl3
NS            500
DS            4
SWH           17985.611 Hz
FIDRES        0.274439 Hz
AQ            1.8219508 sec
RG            362
DW            27.800 usec
DE            6.00 usec
TE            300.0 K
D1            2.00000000 sec
d11           0.03000000 sec
DELTA         1.89999999 sec
TD0           1

----- CHANNEL f1 -----
NUC1          13C
P1            7.40 usec
PL1           -2.00 dB
SFO1          75.4752953 MHz

----- CHANNEL f2 -----
CPDPRG2       waltz16
NUC2          1H
PCPD2         80.00 usec
PL2           0.00 dB
PL12          15.68 dB
PL13          16.00 dB
SFO2          300.1312005 MHz

F2 - Processing parameters
SI            32768
SF            75.4677490 MHz
WDW           EM
SSB           0
LB            1.00 Hz
GB            0
PC            1.40
  
```

Figure S8. <sup>13</sup>C NMR Spectrum of 4c

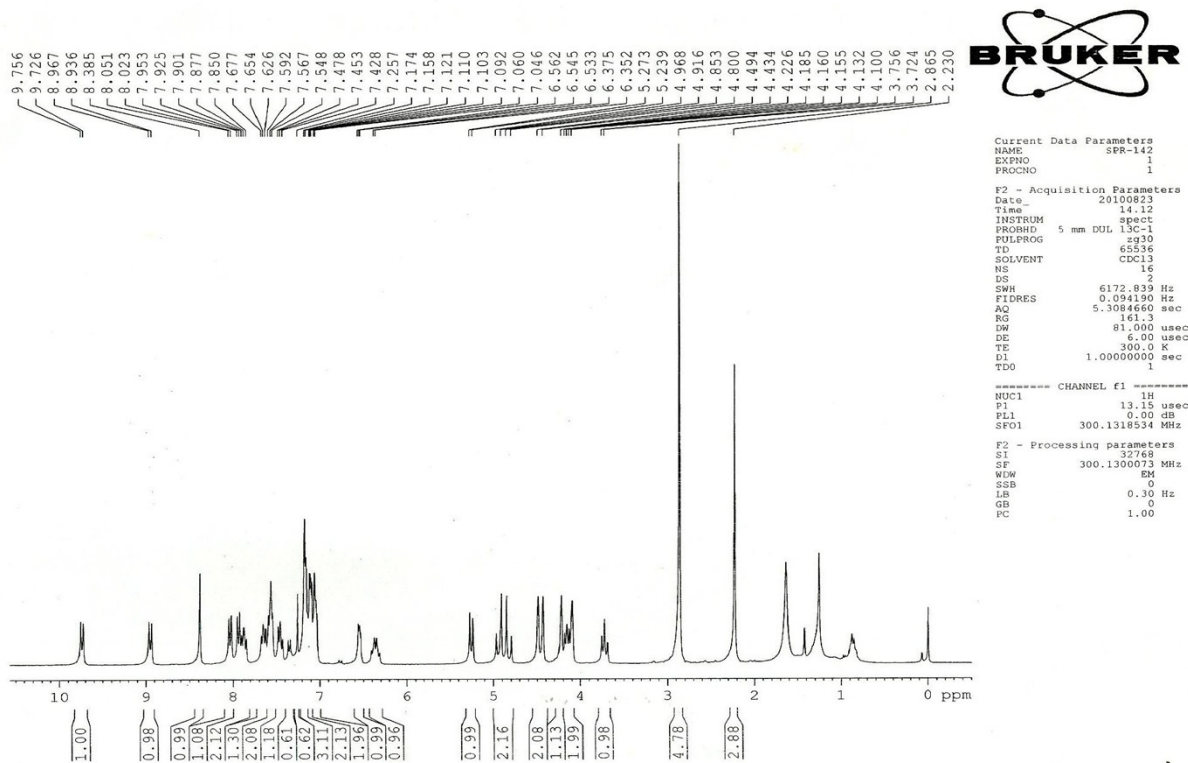

Figure S9. <sup>1</sup>H NMR Spectrum of 4d

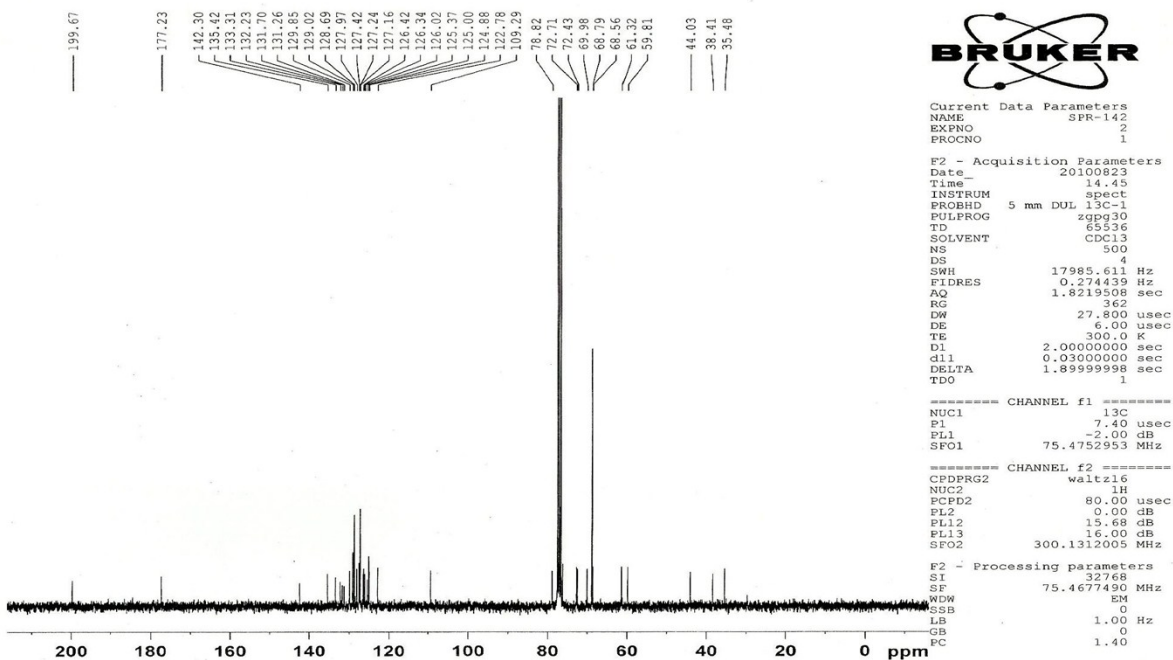

Figure S10. <sup>13</sup>C NMR Spectrum of 4d

### 3. Single crystal X-ray studies:

The compound crystallizes in centrosymmetric space group and in monoclinic crystal system with the space group  $C2/c$ . The pyrrolidine ring [N1/C12-C15] makes the dihedral angle of  $88.43(2)^\circ$  with anthracene (C31-C44) system. The Fe–centroid distance to the substituted cyclopentadienyl ring is  $1.6488(3) \text{ \AA}$  [ $1.6474(14) \text{ \AA}$  for the unsubstituted ring] and the  $Cg3$ —Fe1— $Cg4$  angle is  $178.72(6)^\circ$  where  $Cg3$  and  $Cg4$  are the centroids of the substituted and unsubstituted cyclopentadienyl (Cp) rings, respectively. The five-membered [N1/C12-C15] ring adopts an envelope conformation with C15, the envelope flap, lying  $-0.251(3) \text{ \AA}$  from the plane defined by atoms N1, C12, C13 and C14. The asymmetry parameter  $\Delta C_s[C15]$  is  $0.036(2)$  and puckering parameters  $q_2$  and  $\varphi_2$  are  $0.400(3) \text{ \AA}$  and  $151.10(4)^\circ$ , respectively. The crystal packing of the molecule is stabilized by C-H...O, C-H...  $\pi$  and  $\pi \dots \pi$  types of intra and intermolecular interactions in addition to van der Waals forces. The C-H...O hydrogen bonds link the molecules into dimers. Here, atoms C3 and C28 at  $(x, y, z)$  donate one proton each to atoms  $O_2(1/2-x, -1/2-y, 2-z)$  and  $O_1(1/2-x, 1/2-y, 2-z)$  which connects the molecules forming a cyclic centrosymmetric  $R_2^2(18)$ ,  $R_2^2(22)$  dimers, respectively.

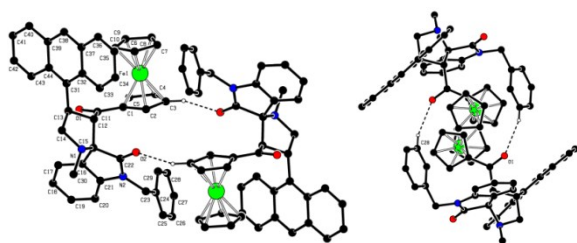

**Figure S11. Formation of  $R_2^2(18)$  and  $R_2^2(22)$  centrosymmetric dimer.**

The C-H... $\pi$  inter and intra molecular interactions are observed by C-H... $\pi$  [C10-H10... $Cg7$  (distance of  $3.569(4) \text{ \AA}$ ) and C14-H14B... $Cg7$  (distance of  $3.546(4) \text{ \AA}$ ), where  $Cg7$  is the centroid of the ring defined by the atoms C31/C32/C37/C38/C39/C44] interactions exist. In the

$\pi$ - $\pi$  [Cg3...Cg4 (x, y, z) distance of 3.295(3) Å) interactions, Cg3 and Cg4 are the centroids of the Cp rings defined by the atoms C1-C5 and C6-C10 respectively].

**Table 1. Hydrogen bonding (C-H... $\pi$  and  $\pi$ ... $\pi$ ) table shows intra and intermolecular interactions [Å and °]**

| COMPOUND              | D-H...A                       | d(D-H) | d(H...A) | d(D...A) | $\angle$ (DHA) |
|-----------------------|-------------------------------|--------|----------|----------|----------------|
| <b>Cycloadduct 4d</b> | C3 --H3...O2 <sup>i</sup>     | 0.98   | 2.40     | 3.318(4) | 155            |
|                       | C28 --H28...O1 <sup>ii</sup>  | 0.93   | 2.46     | 3.341(5) | 158            |
|                       | C45 --H45...O2 <sup>iii</sup> | 0.98   | 2.45     | 3.340(5) | 151            |
|                       | C2 -H2 ...O2                  | 0.98   | 2.52     | 3.337(4) | 140            |
|                       | C10-H10...Cg7                 | 0.98   | 2.77     | 3.569(4) | 140            |
|                       | C14-H14B...Cg7 <sup>iv</sup>  | 0.97   | 2.76     | 3.546(4) | 138            |
|                       | C6 -H6...Cg8                  | 0.98   | 2.84     | 3.675(5) | 144            |
|                       | Cg3... Cg4                    | -      | -        | 3.294(2) | -              |

**Symmetry codes:** (i) 1/2-x, -1/2-y, 2-z (ii) 1/2-x, 1/2-y, 2-z (iii) x, 1+y, -1+z (iv) 1-x, y, 5/2-z

Cg3, g4 centroids of the rings are (C1-C5) and (C6-C10).

Cg7, Cg8 centroids of the rings are (C31/C32/C37/C38/C39/C34) and (C32-C37).

#### 4. UV-Vis & Fluorescence Spectrum

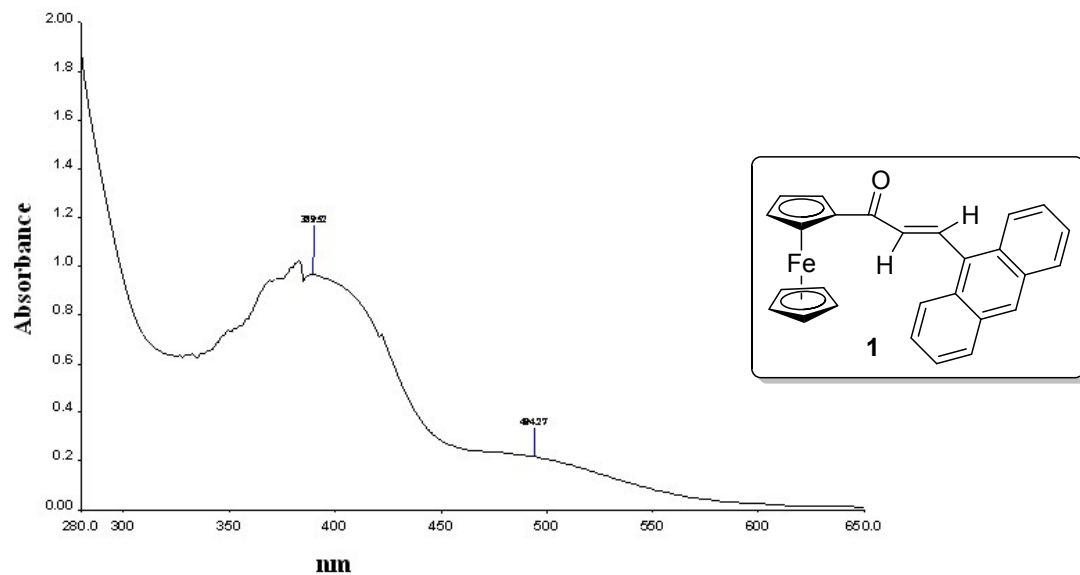

Figure S12. UV-VIS. Spectrum of 1

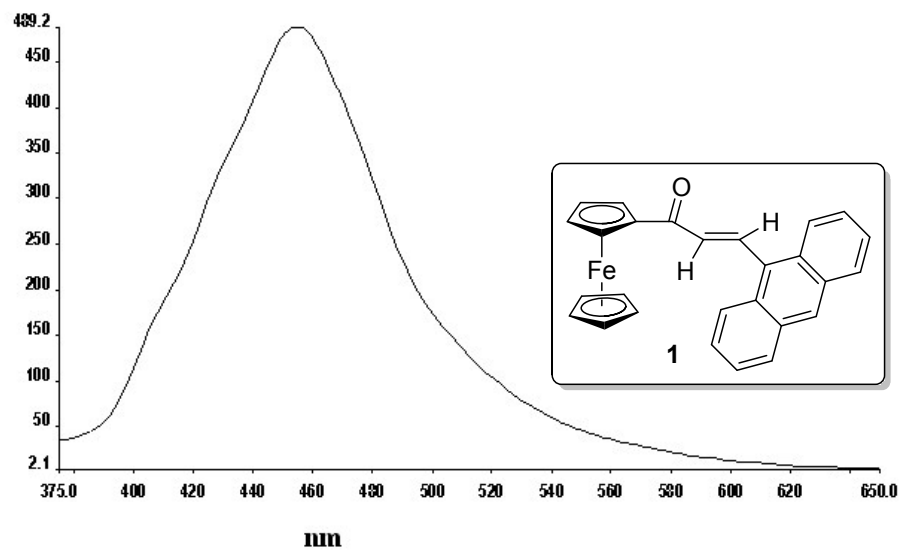

Figure S13. Fluorescence Spectrum of 1

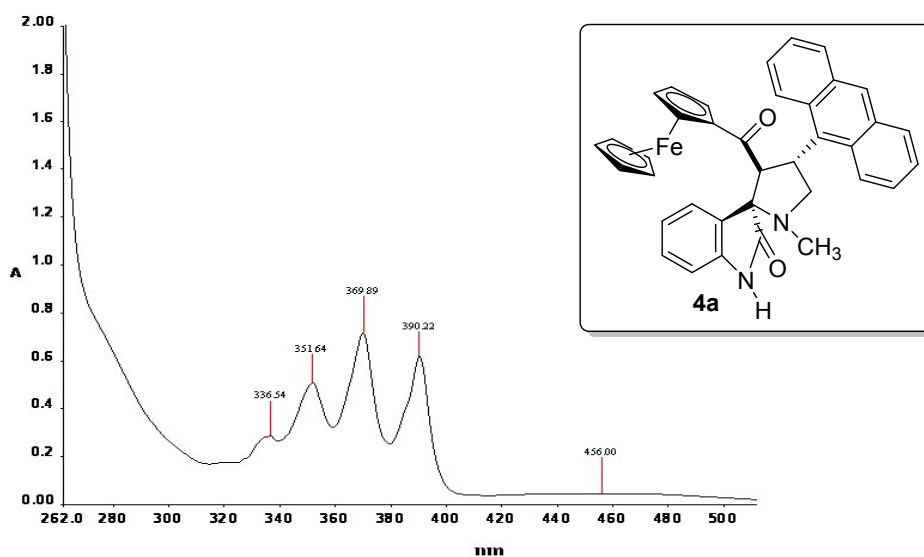

**Figure S14.** UV-VIS. Spectrum of **4a**

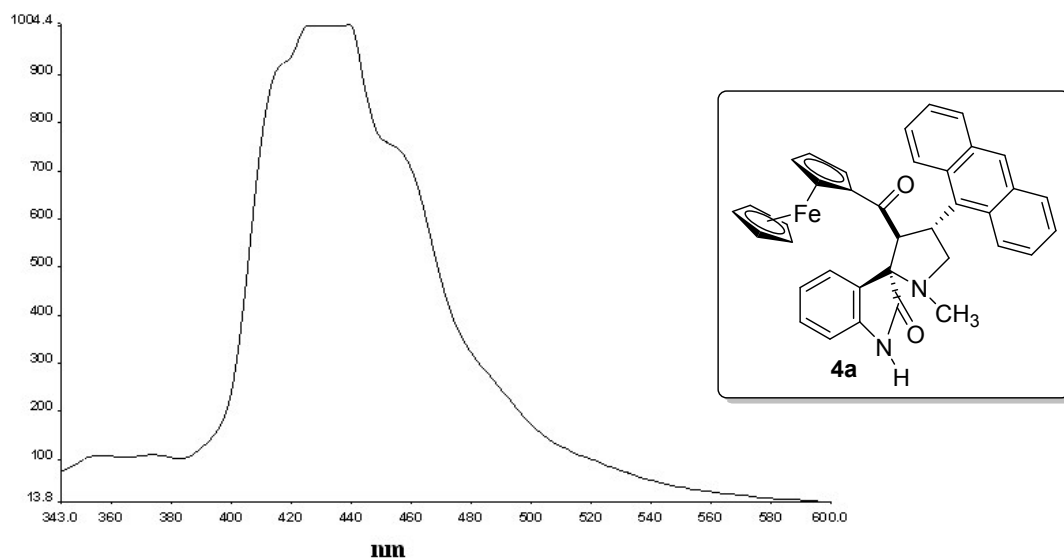

**Figure S15.** Fluorescence Spectrum of **4a**

### **5. Life-time Fluorescence Studies:**

Time-resolved fluorescence decays were obtained by the time-correlated single-photon-counting (TCSPC) method. A diode-pumped Millennia VCW laser (Spectra Physics, 532 nm) was used to pump the Ti-Sapphire rod in a Tsunami picosecond-mode locked laser system (Spectra

Physics). The 750 nm (85 MHz) beam from the Ti-Sapphire laser was passed through a pulse picker (Spectra Physics, 3980 2S) to generate 4 MHz pulses. The second harmonic output (375 nm) was generated by a flexible harmonic generator (Spectra Physics, GWU 23PS). A vertically polarized 375 nm laser was used to excite the sample. The fluorescence emission at the magic angle (54.78) was counted by an MCP PMT apparatus (Hamamatsu R3809U) after being passed through the monochromator and was processed through a constant fraction discriminator (CFD), a time-to-amplitude converter (TAC) and a multichannel analyzer (MC). The instrument response function for this system is  $\approx 52$  ps. The fluorescence decay was obtained and was further analyzed by using IBH (UK) software (DAS-6).

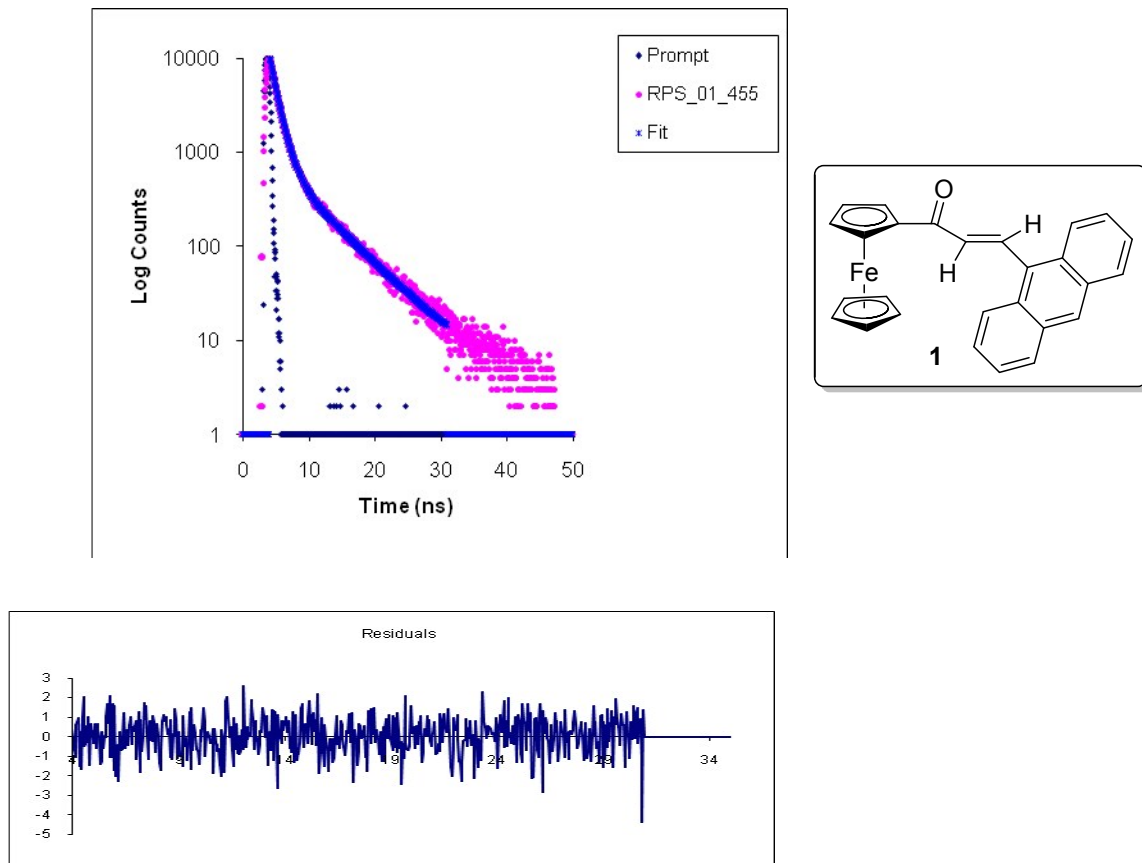

**Figure S16.** Life-time Fluorescence of (1)

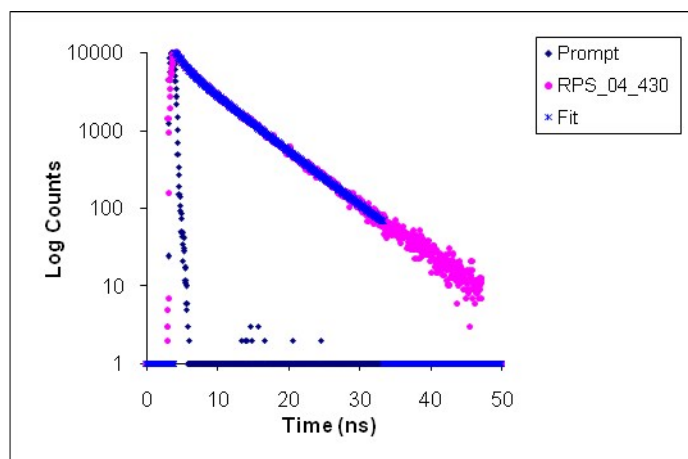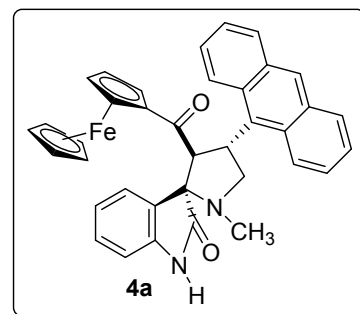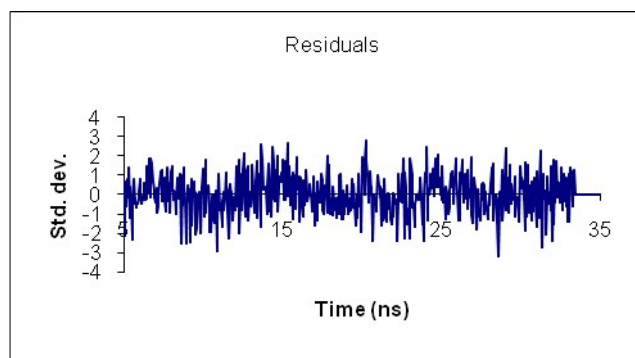

**Figure S17.** Life-time Fluorescence of (4a) at 430
